# Supplementary material
Source: PubMed Central journal article supplement (PMC4174463)
Supplement: NIHMS624558-supplement-Supplemental_Table.pdf [file NIHMS624558-supplement-Supplemental_Table.pdf]

## **SUPPLEMENTAL MATERIAL**

## Supplemental Tables

**Table S1:** Surveys included in the analysis and their characteristics

| Region             | Country (Survey)                  | Year      | Data above 65 years | Survey population (national / sub-national)* | SBP         |      | TC          |      | FPG         |      |
|--------------------|-----------------------------------|-----------|---------------------|----------------------------------------------|-------------|------|-------------|------|-------------|------|
|                    |                                   |           |                     |                                              | Sample size |      | Sample size |      | Sample size |      |
|                    |                                   |           |                     |                                              | Female      | Male | Female      | Male | Female      | Male |
| <b>High income</b> |                                   |           |                     |                                              |             |      |             |      |             |      |
| East Asia          | South Korea (K-NHANES)            | 1998      | Y                   | National with sample weights                 | 5257        | 4514 | 5257        | 4514 | 5257        | 4514 |
| East Asia          | South Korea (K-NHANES)            | 2001      | Y                   | National with sample weights                 | 4051        | 3269 | 4313        | 3552 | 4295        | 3487 |
| East Asia          | South Korea (K-NHANES)            | 2005      | Y                   | National with sample weights                 | 3630        | 2863 | 3585        | 2827 | 3559        | 2804 |
| Australasia        | Australia (AUSDIAB)               | 2001      | Y                   | National with sample weights                 | 4530        | 3645 | 3480        | 2759 | 4575        | 3687 |
| Australasia        | Australia (RFPS)                  | 1989      | N                   | sub-national                                 | 3483        | 3360 | 2662        | 2577 | --          | --   |
| Western Europe     | Germany (BGS)                     | 1998      | Y                   | National with sample weights                 | 2318        | 2145 | 1679        | 1625 | --          | --   |
| Western Europe     | Ireland (SLAN)                    | 1998      | Y                   | National without sample weights              | 225         | 79   | 170         | 58   | --          | --   |
| Western Europe     | Ireland (SLAN)                    | 2002      | Y                   | National without sample weights              | 142         | 107  | 117         | 76   | --          | --   |
| Western Europe     | Scotland (Scottish Health Survey) | 1995      | N                   | sub-national†                                | 2850        | 2318 | --          | --   | --          | --   |
| Western Europe     | Scotland (Scottish Health Survey) | 1998      | N                   | sub-national†                                | 2669        | 2201 | 1676        | 1385 | --          | --   |
| Western Europe     | Scotland (Scottish Health Survey) | 2003      | Y                   | sub-national†                                | 1908        | 1465 | 1041        | 841  | --          | --   |
| Western Europe     | England (HSE)                     | 1991-1992 | Y                   | sub-national†                                | 1629        | 1672 | 1180        | 1122 | --          | --   |
| Western Europe     | England (HSE)                     | 1993      | Y                   | sub-national†                                | 3846        | 4031 | 2864        | 2723 | --          | --   |
| Western Europe     | England (HSE)                     | 1994      | Y                   | sub-national†                                | 3644        | 3684 | 2657        | 2509 | --          | --   |
| Western Europe     | England (HSE)                     | 1995      | Y                   | sub-national†                                | 4243        | 3780 | --          | --   | --          | --   |
| Western Europe     | England (HSE)                     | 1996      | Y                   | sub-national†                                | 2128        | 4432 | --          | --   | --          | --   |
| Western Europe     | England (HSE)                     | 1997      | Y                   | sub-national†                                | 2371        | 2128 | --          | --   | --          | --   |
| Western Europe     | England (HSE)                     | 1998      | Y                   | sub-national†                                | 3889        | 3704 | 2705        | 2454 | --          | --   |
| Western Europe     | England (HSE)                     | 2001      | Y                   | sub-national†                                | 2133        | 1249 | --          | --   | --          | --   |
| Western Europe     | England (HSE)                     | 2002      | Y                   | sub-national†                                | 1085        | 554  | --          | --   | --          | --   |
| Western Europe     | England (HSE)                     | 2003      | Y                   | sub-national†                                | 1949        | 1173 | 2070        | 1803 | 351         | 283  |
| Western Europe     | England (HSE)                     | 2005      | Y                   | sub-national†                                | 940         | 591  | --          | --   | --          | --   |
| Western Europe     | England (HSE)                     | 2006      | Y                   | sub-national†                                | 1733        | 1118 | 1873        | 1528 | --          | --   |
| Western Europe     | England (HSE)                     | 2007      | Y                   | sub-national†                                | 819         | 522  | --          | --   | --          | --   |
| Middle East        | Kuwait (STEP)                     | 2006      | N                   | National with sample weights                 | 1052        | 696  | 866         | 545  | 962         | 629  |
| Middle East        | Qatar (GCC)                       | 2006      | N                   | National with sample weights                 | 1427        | 1406 | --          | --   | --          | --   |
| North America      | Canada (Heart Health Survey)      | 1989      | N                   | National with sample weights                 | 5882        | 5671 | --          | --   | --          | --   |
| North America      | US (NHANES II)                    | 1976-1980 | N                   | National with sample weights                 | 3438        | 3118 | 2153        | 1915 | 1218        | 1057 |
| North America      | US (NHANES III)                   | 1998-1994 | Y                   | National with sample weights                 | 4597        | 4024 | 3549        | 2974 | 4634        | 4000 |

| Region                      | Country (Survey)                  | Year      | Data above 65 years | Survey population (national / sub-national)* | SBP         |       | TC          |       | FPG         |       |
|-----------------------------|-----------------------------------|-----------|---------------------|----------------------------------------------|-------------|-------|-------------|-------|-------------|-------|
|                             |                                   |           |                     |                                              | Sample size |       | Sample size |       | Sample size |       |
|                             |                                   |           |                     |                                              | Female      | Male  | Female      | Male  | Female      | Male  |
| North America               | US (NHANES)                       | 1999-2002 | Y                   | National with sample weights                 | 2368        | 2225  | 1950        | 1767  | 1288        | 1210  |
| North America               | US (NHANES)                       | 2003-2004 | Y                   | National with sample weights                 | 1067        | 990   | 868         | 920   | 615         | 538   |
| North America               | US (NHANES)                       | 2005-2006 | Y                   | National with sample weights                 | 1150        | 1098  | 972         | 928   | 616         | 594   |
| <b>Low or middle income</b> |                                   |           |                     |                                              |             |       |             |       |             |       |
| Central Asia                | Mongolia (STEP)                   | 2005      | N                   | National with sample weights                 | 1213        | 1154  | --          | --    | --          | --    |
| East Asia                   | China (CHNS)                      | 1991      | Y                   | sub-national                                 | 2362        | 2432  | --          | --    | --          | --    |
| East Asia                   | China (CHNS)                      | 1993      | Y                   | sub-national                                 | 2435        | 2460  | --          | --    | --          | --    |
| East Asia                   | China (CHNS)                      | 1997      | Y                   | sub-national                                 | 2943        | 2643  | --          | --    | --          | --    |
| East Asia                   | China (CHNS)                      | 2000      | Y                   | sub-national                                 | 3372        | 3071  | --          | --    | --          | --    |
| East Asia                   | China (SAGE)                      | 2009      | N                   | National without sample weights              | 1685        | 1558  | --          | --    | --          | --    |
| South Asia                  | India (SAGE)                      | 2007      | N                   | National with sample weights                 | 4376        | 2715  | --          | --    | --          | --    |
| Southeast Asia              | Indonesia (FLS 3)                 | 2000      | Y                   | sub-national                                 | 6752        | 5954  | --          | --    | --          | --    |
| Southeast Asia              | Sri Lanka (STEP)                  | 2006      | N                   | National without sample weights              | 4409        | 4331  | --          | --    | --          | --    |
| Southeast Asia              | Thailand (NHES 1)                 | 1992      | Y                   | National with sample weights                 | 4945        | 3606  | 3496        | 2688  | 4359        | 3360  |
| Southeast Asia              | Thailand (NHES 2)                 | 1997      | Y                   | National without sample weights              | 2154        | 1437  | 1011        | 598   | --          | --    |
| Southeast Asia              | Thailand (NHES 3)                 | 2004      | Y                   | National with sample weights                 | 11931       | 10505 | 7282        | 6188  | 11321       | 9948  |
| Southeast Asia              | Vietnam (NHS)                     | 2002      | Y                   | National with sample weights                 | 30664       | 26079 | --          | --    | --          | --    |
| Eastern Europe              | Russia (LMS)                      | 1993      | Y                   | National without sample weights              | 2847        | 4033  | --          | --    | --          | --    |
| Eastern Europe              | Russia (LMS)                      | 1994      | Y                   | National without sample weights              | 3590        | 2847  | --          | --    | --          | --    |
| Eastern Europe              | Russia (LMS)                      | 1992-1993 | Y                   | National without sample weights              | 3760        | 2995  | --          | --    | --          | --    |
| Latin America and Caribbean | Colombia (National Health Survey) | 2007      | N                   | National with sample weights                 | 4813        | 3332  | 4018        | 2688  | 4811        | 3283  |
| Latin America and Caribbean | Dominica (STEP)                   | 2007      | N                   | National with sample weights                 | 407         | 330   | --          | --    | --          | --    |
| Latin America and Caribbean | Mexico (ENSA)                     | 2000      | Y                   | National with sample weights                 | 6388        | 15413 | --          | --    | --          | --    |
| Latin America and Caribbean | Mexico (ENSANUT)                  | 2006      | Y                   | National with sample weights                 | 13214       | 8625  | --          | --    | --          | --    |
| Latin America and Caribbean | St. Kitts (STEP)                  | 2007      | N                   | sub-national                                 | 688         | 396   | --          | --    | --          | --    |
| Middle East                 | Algeria (STEP)                    | 2003      | N                   | sub-national                                 | 1998        | 1357  | 1436        | 933   | 1693        | 1131  |
| Middle East                 | Iran (NCDS)                       | 2005      | N                   | National with sample weights                 | 27622       | 27879 | 15979       | 14480 | 22263       | 20750 |
| Middle East                 | Turkey (PatenT)                   | 2003      | Y                   | National without sample weights              | 1186        | 1820  | --          | --    | --          | --    |
| Oceania                     | American Samoa (STEP)             | 2004      | N                   | National without sample weights              | 937         | 824   | --          | --    | 894         | 783   |
| Oceania                     | Cook Islands (STEP)               | 2003      | N                   | National without sample weights              | 858         | 845   | --          | --    | --          | --    |

| Region             | Country (Survey)            | Year | Data above 65 years | Survey population (national / sub-national)* | SBP         |      | TC          |      | FPG         |      |
|--------------------|-----------------------------|------|---------------------|----------------------------------------------|-------------|------|-------------|------|-------------|------|
|                    |                             |      |                     |                                              | Sample size |      | Sample size |      | Sample size |      |
|                    |                             |      |                     |                                              | Female      | Male | Female      | Male | Female      | Male |
| Oceania            | Fiji (STEP)                 | 2002 | N                   | National without sample weights              | 2572        | 1732 | --          | --   | --          | --   |
| Oceania            | Kiribati (STEP)             | 2004 | N                   | National without sample weights              | 664         | 521  | --          | --   | 537         | 431  |
| Oceania            | Marshall Islands (STEP)     | 2002 | N                   | National without sample weights              | 638         | 418  | --          | --   | --          | --   |
| Oceania            | Micronesia (STEP)           | 2003 | N                   | sub-national                                 | 836         | 548  | --          | --   | --          | --   |
| Oceania            | Nauru (STEP)                | 2004 | N                   | National with sample weights                 | 753         | 681  | 692         | 615  | 697         | 628  |
| Oceania            | Samoa (STEP)                | 2002 | N                   | National without sample weights              | 1161        | 967  | 858         | 705  | 1106        | 923  |
| Oceania            | Solomon Islands (STEP)      | 2005 | N                   | sub-national                                 | 794         | 551  | --          | --   | --          | --   |
| Oceania            | Tokelau (STEP)              | 2005 | N                   | National without sample weights              | 208         | 169  | 125         | 113  | 206         | 168  |
| Oceania            | Tonga (STEP)                | 2004 | N                   | National without sample weights              | 447         | 309  | --          | --   | --          | --   |
| Oceania            | Vanuatu (STEP)              | 2005 | N                   | sub-national                                 | 415         | 315  | --          | --   | --          | --   |
| Sub-Saharan Africa | Benin (STEP)                | 2008 | N                   | National without sample weights              | 2818        | 2813 | --          | --   | --          | --   |
| Sub-Saharan Africa | Botswana (STEP)             | 2007 | N                   | National with sample weights                 | 2000        | 896  | --          | --   | --          | --   |
| Sub-Saharan Africa | Cameroon (STEP)             | 2003 | N                   | sub-national                                 | 2714        | 1753 | --          | --   | --          | --   |
| Sub-Saharan Africa | Cape Verde (STEP)           | 2007 | N                   | National with sample weights                 | 963         | 542  | --          | --   | --          | --   |
| Sub-Saharan Africa | Eritrea (STEP)              | 2004 | N                   | National without sample weights              | 784         | 787  | --          | --   | --          | --   |
| Sub-Saharan Africa | Ethiopia (STEP)             | 2006 | N                   | sub-national                                 | 1971        | 1277 | --          | --   | --          | --   |
| Sub-Saharan Africa | Gabon (STEP)                | 2009 | N                   | sub-national                                 | 924         | 719  | --          | --   | --          | --   |
| Sub-Saharan Africa | Ghana (SAGE)                | 2009 | N                   | National with sample weights                 | 1254        | 1605 | --          | --   | --          | --   |
| Sub-Saharan Africa | Madagascar (STEP)           | 2005 | N                   | sub-national                                 | 2208        | 2148 | --          | --   | --          | --   |
| Sub-Saharan Africa | Mozambique (STEP)           | 2005 | N                   | National without sample weights              | 1380        | 1015 | --          | --   | --          | --   |
| Sub-Saharan Africa | Niger (STEP)                | 2007 | N                   | National without sample weights              | 768         | 1057 | --          | --   | --          | --   |
| Sub-Saharan Africa | Sao Tome et Principe (STEP) | 2009 | N                   | National without sample weights              | 1063        | 760  | --          | --   | --          | --   |
| Sub-Saharan Africa | Seychelles (STEP)           | 2004 | N                   | National with sample weights                 | 617         | 513  | 428         | 350  | 606         | 494  |
| Sub-Saharan Africa | South Africa (DHS)          | 1998 | Y                   | National with sample weights                 | 4008        | 2635 | --          | --   | --          | --   |
| Sub-Saharan Africa | South Africa (SAGE)         | 2009 | N                   | National with sample weights                 | 1699        | 1301 | --          | --   | --          | --   |

\* Sub-national refers to surveys that cover multiple communities or regions within a country.

† Surveys designed to be representative of all of England or Scotland, similar to a national survey. Their classification as subnational here is simply because they do not cover all of UK

\*\*Of surveys that met eligibility criteria (subnational or national survey, covering at least some decades of middle-age and older adult ages), we excluded the following surveys for reasons stated:

RLMS 1992 – First round of survey, documentation cited issues in data collection.

England HSE 1999 – Oversampled minorities and not representative when individual records used for estimating intercept and slope.

England HSE 2004 – Oversampled minorities and not representative when individual records used for estimating intercept and slope.

Mexico ENSA 2000 – How sample was selected for lab measurement was unknown at the time of analysis; excluded from FPG and TC analysis.

Thailand NHES2 – Fasting level of full sample was known; excluded from FPG analysis.

Jordan BRFSS 2004 and 2007 – How sample was selected for physical and lab measurement was unknown at the time of analysis.

**Table S2:** Age association slope and intercept for surveys used in the analysis

| Region                      | Country (Survey)                  | Year      | SBP (mmHg)              |      | TC (mg/dL)              |       | FPG (mg/dL)             |       | SBP (mmHg)          |        | TC (mg/dL)          |        | FPG (mg/dL)         |       |
|-----------------------------|-----------------------------------|-----------|-------------------------|------|-------------------------|-------|-------------------------|-------|---------------------|--------|---------------------|--------|---------------------|-------|
|                             |                                   |           | Slope per decade of age |      | Slope per decade of age |       | Slope per decade of age |       | Intercept at age 30 |        | Intercept at age 30 |        | Intercept at age 30 |       |
|                             |                                   |           | Female                  | Male | Female                  | Male  | Female                  | Male  | Female              | Male   | Female              | Male   | Female              | Male  |
| <b>High income</b>          |                                   |           |                         |      |                         |       |                         |       |                     |        |                     |        |                     |       |
| East Asia                   | South Korea (K-NHANES)            | 1998      | 8.09                    | 4.29 | 12.95                   | 1.45  | 6.25                    | 4.65  | 110.81              | 121.26 | 170.79              | 189.09 | 91.79               | 96.01 |
| East Asia                   | South Korea (K-NHANES)            | 2001      | 8.26                    | 4.57 | 14.69                   | 2.30  | 3.32                    | 2.40  | 106.12              | 118.87 | 182.60              | 207.55 | 92.15               | 95.96 |
| East Asia                   | South Korea(K-NHANES)             | 2005      | 8.39                    | 5.05 | 12.37                   | 1.30  | 4.24                    | 5.02  | 102.56              | 114.63 | 166.82              | 185.71 | 86.69               | 91.22 |
| Australasia                 | Australia (AUSDIAB)               | 2001      | 7.61                    | 5.12 | 14.28                   | 9.64  | 4.14                    | 5.41  | 108.92              | 119.84 | 192.03              | 207.47 | 90.76               | 94.44 |
| Australasia                 | Australia (RFPS)                  | 1989      | 9.46                    | 6.32 | 16.38                   | 11.75 |                         |       | 107.18              | 118.39 | 187.53              | 204.25 |                     |       |
| Western Europe              | Germany (BGS)                     | 1998      | 10.60                   | 6.40 | 17.51                   | 14.55 |                         |       | 115.95              | 126.37 | 204.75              | 219.48 |                     |       |
| Western Europe              | Ireland (SLAN)                    | 1998      | 10.61                   | 7.09 | 21.01                   | 17.42 |                         |       | 107.65              | 122.84 | 177.01              | 193.22 |                     |       |
| Western Europe              | Ireland (SLAN)                    | 2002      | 6.44                    | 7.03 | 21.01                   | 17.42 |                         |       | 118.84              | 124.09 | 177.01              | 193.22 |                     |       |
| Western Europe              | Scotland (Scottish Health Survey) | 1995      | 8.46                    | 4.46 |                         |       |                         |       | 113.86              | 126.62 |                     |        |                     |       |
| Western Europe              | Scotland (Scottish Health Survey) | 1998      | 8.30                    | 4.83 | 18.75                   | 11.81 |                         |       | 114.18              | 125.74 | 185.70              | 204.14 |                     |       |
| Western Europe              | Scotland (Scottish Health Survey) | 2003      | 7.44                    | 3.53 | 19.34                   | 11.19 |                         |       | 112.26              | 125.51 | 190.56              | 208.00 |                     |       |
| Western Europe              | England (HSE)                     | 1991-1992 | 8.80                    | 5.04 | 20.66                   | 12.68 |                         |       | 119.08              | 130.02 | 192.81              | 212.94 |                     |       |
| Western Europe              | England (HSE)                     | 1993      | 8.14                    | 5.04 | 21.70                   | 12.77 |                         |       | 118.90              | 130.23 | 191.40              | 214.64 |                     |       |
| Western Europe              | England (HSE)                     | 1994      | 8.18                    | 4.93 | 20.29                   | 15.20 |                         |       | 117.51              | 128.45 | 195.04              | 213.80 |                     |       |
| Western Europe              | England (HSE)                     | 1995      | 7.78                    | 4.70 |                         |       |                         |       | 118.45              | 129.27 |                     |        |                     |       |
| Western Europe              | England (HSE)                     | 1996      | 8.36                    | 4.79 |                         |       |                         |       | 117.86              | 129.10 |                     |        |                     |       |
| Western Europe              | England (HSE)                     | 1997      | 7.71                    | 4.39 |                         |       |                         |       | 117.73              | 129.04 |                     |        |                     |       |
| Western Europe              | England (HSE)                     | 1998      | 7.68                    | 4.34 | 16.68                   | 9.91  |                         |       | 116.70              | 128.14 | 187.59              | 203.72 |                     |       |
| Western Europe              | England (HSE)                     | 2001      | 7.25                    | 4.50 |                         |       |                         |       | 118.29              | 128.04 |                     |        |                     |       |
| Western Europe              | England (HSE)                     | 2002      | 7.41                    | 4.42 |                         |       |                         |       | 117.55              | 127.23 |                     |        |                     |       |
| Western Europe              | England (HSE)                     | 2003      | 6.94                    | 3.69 | 17.75                   | 9.52  | 0.93                    | 4.06  | 112.55              | 125.62 | 190.25              | 211.77 | 88.08               | 86.40 |
| Western Europe              | England (HSE)                     | 2005      | 6.22                    | 3.12 |                         |       |                         |       | 112.89              | 126.16 |                     |        |                     |       |
| Western Europe              | England (HSE)                     | 2006      | 6.45                    | 3.53 | 17.42                   | 9.18  |                         |       | 112.33              | 125.50 | 185.87              | 204.79 |                     |       |
| Western Europe              | England (HSE)                     | 2007      | 6.73                    | 3.32 |                         |       |                         |       | 111.99              | 124.54 |                     |        |                     |       |
| Middle East                 | Kuwait (STEP)                     | 2006      | 7.65                    | 5.25 | 8.64                    | 0.19  | 20.42                   | 18.38 | 111.13              | 116.84 | 187.35              | 202.86 | 82.93               | 91.40 |
| Middle East                 | Qatar (GCC)                       | 2006      | 8.15                    | 4.46 |                         |       |                         |       | 114.39              | 123.14 |                     |        |                     |       |
| North America               | Canada (Heart Health Survey)      | 1989      | 8.15                    | 6.12 |                         |       |                         |       | 108.64              | 119.66 |                     |        |                     |       |
| North America               | US (NHANES II)                    | 1978      | 8.79                    | 4.69 | 22.44                   | 11.68 | 3.36                    | 2.90  | 111.10              | 122.57 | 186.45              | 202.76 | 88.03               | 92.29 |
| North America               | US (NHANES III)                   | 1991      | 8.70                    | 5.67 | 16.81                   | 7.96  | 7.77                    | 6.06  | 109.10              | 118.24 | 182.57              | 198.73 | 89.77               | 94.53 |
| North America               | US (NHANES)                       | 2000      | 8.62                    | 4.27 | 8.48                    | 7.32  | 7.22                    | 7.08  | 107.23              | 116.92 | 193.04              | 198.04 | 89.55               | 95.25 |
| North America               | US (NHANES)                       | 2004      | 8.63                    | 4.41 | 5.01                    | 7.76  | 7.67                    | 7.97  | 107.46              | 116.42 | 196.76              | 198.52 | 89.73               | 95.88 |
| North America               | US (NHANES)                       | 2006      | 8.57                    | 3.96 | 3.75                    | 5.73  | 9.23                    | 7.78  | 106.05              | 117.76 | 196.37              | 196.31 | 90.35               | 95.74 |
| <b>Low or middle income</b> |                                   |           |                         |      |                         |       |                         |       |                     |        |                     |        |                     |       |
| Central Asia                | Mongolia (STEP)                   | 2005      | 8.72                    | 6.78 | --                      | --    | --                      | --    | 116.90              | 124.66 | --                  | --     | --                  | --    |
| East Asia                   | China (CHNS)                      | 1991      | 6.47                    | 5.33 | --                      | --    | --                      | --    | 104.03              | 109.15 | --                  | --     | --                  | --    |
| East Asia                   | China (CHNS)                      | 1993      | 6.48                    | 4.42 | --                      | --    | --                      | --    | 104.16              | 110.55 | --                  | --     | --                  | --    |
| East Asia                   | China (CHNS)                      | 1997      | 6.64                    | 4.35 | --                      | --    | --                      | --    | 107.15              | 113.38 | --                  | --     | --                  | --    |
| East Asia                   | China (CHNS)                      | 2000      | 6.65                    | 4.51 | --                      | --    | --                      | --    | 107.21              | 113.96 | --                  | --     | --                  | --    |
| East Asia                   | China (SAGE)                      | 2009      | 7.91                    | 5.33 | --                      | --    | --                      | --    | 115.52              | 123.37 | --                  | --     | --                  | --    |
| South Asia                  | India (SAGE)                      | 2007      | 4.22                    | 2.06 | --                      | --    | --                      | --    | 110.83              | 113.91 | --                  | --     | --                  | --    |
| Southeast Asia              | Indonesia (FLS 3)                 | 2000      | 9.77                    | 6.66 | --                      | --    | --                      | --    | 114.25              | 119.16 | --                  | --     | --                  | --    |
| Southeast Asia              | Sri Lanka (STEP)                  | 2006      | 6.95                    | 4.43 | --                      | --    | --                      | --    | 114.35              | 121.89 | --                  | --     | --                  | --    |
| Southeast Asia              | Thailand (NHES 1)                 | 1992      | 5.91                    | 3.54 | 10.92                   | 5.68  | 4.32                    | 2.79  | 108.24              | 112.33 | 177.34              | 179.12 | 91.82               | 91.57 |
| Southeast Asia              | Thailand (NHES 2)                 | 1997      | 7.90                    | 6.24 | 16.07                   | 5.21  |                         |       | 108.58              | 115.85 | 188.23              | 190.57 | --                  | --    |
| Southeast Asia              | Thailand (NHES 3)                 | 2004      | 7.03                    | 5.19 | 14.86                   | 5.02  | 7.36                    | 4.16  | 108.43              | 114.48 | 185.67              | 195.33 | 86.03               | 93.15 |



| Region                      | Country (Survey)                  | Year      | SBP (mmHg)              |       | TC (mg/dL)              |       | FPG (mg/dL)             |       | SBP (mmHg)          |        | TC (mg/dL)          |        | FPG (mg/dL)         |        |
|-----------------------------|-----------------------------------|-----------|-------------------------|-------|-------------------------|-------|-------------------------|-------|---------------------|--------|---------------------|--------|---------------------|--------|
|                             |                                   |           | Slope per decade of age |       | Slope per decade of age |       | Slope per decade of age |       | Intercept at age 30 |        | Intercept at age 30 |        | Intercept at age 30 |        |
|                             |                                   |           | Female                  | Male  | Female                  | Male  | Female                  | Male  | Female              | Male   | Female              | Male   | Female              | Male   |
| Southeast Asia              | Vietnam (NHS)                     | 2002      | 7.59                    | 5.33  | --                      | --    | --                      | --    | 107.98              | 115.04 | --                  | --     | --                  | --     |
| Eastern Europe              | Russia (LMS)                      | 1993      | 8.91                    | 4.37  | --                      | --    | --                      | --    | 112.36              | 121.44 | --                  | --     | --                  | --     |
| Eastern Europe              | Russia (LMS)                      | 1994      | 8.89                    | 4.40  | --                      | --    | --                      | --    | 112.24              | 121.47 | --                  | --     | --                  | --     |
| Eastern Europe              | Russia (LMS)                      | 1992-1993 | 9.07                    | 5.19  | --                      | --    | --                      | --    | 113.86              | 122.03 | --                  | --     | --                  | --     |
| Latin America and Caribbean | Colombia (National Health Survey) | 2007      | 9.82                    | 5.96  | 15.00                   | 6.90  | 4.53                    | 2.50  | 111.28              | 122.54 | 164.63              | 175.79 | 80.61               | 85.58  |
| Latin America and Caribbean | Dominica (STEP)                   | 2007      | 10.52                   | 5.71  | --                      | --    | --                      | --    | 117.91              | 127.27 | --                  | --     | --                  | --     |
| Latin America and Caribbean | Mexico (ENSA)                     | 2000      | 6.56                    | 3.77  | --                      | --    | --                      | --    | 113.65              | 119.93 | --                  | --     | --                  | --     |
| Latin America and Caribbean | Mexico (ENSANUT)                  | 2006      | 6.57                    | 3.86  | --                      | --    | --                      | --    | 112.39              | 119.08 | --                  | --     | --                  | --     |
| Latin America and Caribbean | St. Kitts (STEP)                  | 2007      | 9.22                    | 5.77  | --                      | --    | --                      | --    | 116.53              | 128.48 | --                  | --     | --                  | --     |
| Middle East                 | Algeria (STEP)                    | 2003      | 8.37                    | 6.09  | 4.04                    | 3.28  | 2.63                    | 0.83  | 119.46              | 119.44 | 182.74              | 177.15 | 87.43               | 89.28  |
| Middle East                 | Iran (NCDS)                       | 2005      | 9.16                    | 6.09  | 15.12                   | 6.94  | 8.11                    | 4.57  | 110.62              | 115.79 | 184.70              | 188.99 | 97.78               | 100.45 |
| Middle East                 | Turkey (Patent)                   | 2003      | 5.65                    | 10.65 | --                      | --    | --                      | --    | 118.95              | 118.01 | --                  | --     | --                  | --     |
| Oceania                     | American Samoa (STEP)             | 2004      | 8.79                    | 5.09  | --                      | --    | 16.05                   | 12.33 | 117.10              | 129.21 | --                  | --     | 122.13              | 129.59 |
| Oceania                     | Cook Islands (STEP)               | 2003      | 8.06                    | 5.64  | --                      | --    | --                      | --    | 115.65              | 127.38 | --                  | --     | --                  | --     |
| Oceania                     | Fiji (STEP)                       | 2002      | 8.81                    | 3.40  | --                      | --    | --                      | --    | 114.07              | 122.41 | --                  | --     | --                  | --     |
| Oceania                     | Kiribati (STEP)                   | 2004      | 4.31                    | 3.08  | --                      | --    | 11.18                   | 13.91 | 111.55              | 121.91 | --                  | --     | 111.86              | 113.21 |
| Oceania                     | Marshall Islands (STEP)           | 2002      | 10.35                   | 4.67  | --                      | --    | --                      | --    | 101.62              | 114.91 | --                  | --     | --                  | --     |
| Oceania                     | Micronesia (STEP)                 | 2003      | 7.58                    | 4.47  | --                      | --    | --                      | --    | 109.97              | 123.52 | --                  | --     | --                  | --     |
| Oceania                     | Nauru (STEP)                      | 2004      | 11.27                   | 6.56  | 13.88                   | 2.99  | 19.59                   | 12.71 | 111.21              | 124.88 | 175.22              | 180.09 | 75.96               | 79.94  |
| Oceania                     | Samoa (STEP)                      | 2002      | 8.61                    | 3.69  | 11.21                   | 10.40 | 14.69                   | 10.82 | 111.20              | 125.40 | 152.87              | 154.95 | 101.76              | 106.00 |
| Oceania                     | Solomon Islands (STEP)            | 2005      | 7.63                    | 2.93  | --                      | --    | --                      | --    | 106.99              | 114.01 | --                  | --     | --                  | --     |
| Oceania                     | Tokelau (STEP)                    | 2005      | 10.71                   | 2.04  | 8.52                    | 15.41 | 18.28                   | 11.61 | 103.28              | 122.43 | 184.40              | 174.44 | 110.24              | 127.60 |
| Oceania                     | Tonga (STEP)                      | 2004      | 6.47                    | 2.04  | --                      | --    | --                      | --    | 114.90              | 126.37 | --                  | --     | --                  | --     |
| Oceania                     | Vanuatu (STEP)                    | 2005      | 8.88                    | 2.79  | --                      | --    | --                      | --    | 123.42              | 130.51 | --                  | --     | --                  | --     |
| Sub-Saharan Africa          | Benin (STEP)                      | 2008      | 8.48                    | 4.09  | --                      | --    | --                      | --    | 115.61              | 125.07 | --                  | --     | --                  | --     |
| Sub-Saharan Africa          | Botswana (STEP)                   | 2007      | 8.80                    | 3.99  | --                      | --    | --                      | --    | 120.24              | 125.65 | --                  | --     | --                  | --     |
| Sub-Saharan Africa          | Cameroon (STEP)                   | 2003      | 9.12                    | 5.90  | --                      | --    | --                      | --    | 112.33              | 120.44 | --                  | --     | --                  | --     |
| Sub-Saharan Africa          | Cape Verde (STEP)                 | 2007      | 9.37                    | 1.71  | --                      | --    | --                      | --    | 120.53              | 136.49 | --                  | --     | --                  | --     |
| Sub-Saharan Africa          | Eritrea (STEP)                    | 2004      | 8.11                    | 4.10  | --                      | --    | --                      | --    | 107.30              | 116.01 | --                  | --     | --                  | --     |
| Sub-Saharan Africa          | Ethiopia (STEP)                   | 2006      | 8.38                    | 8.34  | --                      | --    | --                      | --    | 115.93              | 119.77 | --                  | --     | --                  | --     |
| Sub-Saharan Africa          | Gabon (STEP)                      | 2009      | 6.67                    | 4.92  | --                      | --    | --                      | --    | 117.39              | 123.65 | --                  | --     | --                  | --     |
| Sub-Saharan Africa          | Ghana (SAGE)                      | 2009      | 5.52                    | 3.04  | --                      | --    | --                      | --    | 119.43              | 124.77 | --                  | --     | --                  | --     |
| Sub-Saharan Africa          | Madagascar (STEP)                 | 2005      | 7.83                    | 5.09  | --                      | --    | --                      | --    | 119.09              | 123.44 | --                  | --     | --                  | --     |
| Sub-Saharan Africa          | Mozambique (STEP)                 | 2005      | 10.60                   | 6.60  | --                      | --    | --                      | --    | 120.48              | 126.87 | --                  | --     | --                  | --     |
| Sub-Saharan Africa          | Niger (STEP)                      | 2007      | 7.63                    | 5.81  | --                      | --    | --                      | --    | 125.84              | 130.04 | --                  | --     | --                  | --     |
| Sub-Saharan Africa          | Sao Tome et Principe (STEP)       | 2009      | 11.63                   | 5.16  | --                      | --    | --                      | --    | 120.52              | 132.25 | --                  | --     | --                  | --     |
| Sub-Saharan Africa          | Seychelles (STEP)                 | 2004      | 8.82                    | 6.49  | 16.26                   | 3.05  | 12.23                   | 9.18  | 113.08              | 123.92 | 187.96              | 207.56 | 88.00               | 97.68  |
| Sub-Saharan Africa          | South Africa (DHS)                | 1998      | 7.52                    | 5.14  | --                      | --    | --                      | --    | 110.34              | 117.92 | --                  | --     | --                  | --     |
| Sub-Saharan Africa          | South Africa (SAGE)               | 2009      | 6.73                    | 3.74  | --                      | --    | --                      | --    | 123.51              | 132.74 | --                  | --     | --                  | --     |
